# Supplementary material for: Continuous EEG use and status epilepticus treatment in Australasia: a practice survey of Australian and New Zealand epileptologists
Source: HighWire-hosted journal article supplement (doi:10.1136/bmjno-2020-000102), 2020-12-01
Supplement: bmjno-2020-000102supp001_data_supplement.pdf [file bmjno-2020-000102supp001_data_supplement.pdf]

## APPENDIX 1 - SURVEY

### Demographics

1. What is your age?
  - a. 18 – 30
  - b. 31 – 40
  - c. 41 – 50
  - d. 51 – 60
  - e. Over 60 years
2. What is your gender
  - a. Male
  - b. Female
  - c. Other
3. Do you work in more than 1 hospital (for eg >1 public or a public and private)?
  - a. Yes
  - b. No
4. Do you treat paediatrics and/or adult patients?
  - a. Paediatrics only
  - b. Adults only
  - c. Both
5. How would you describe the hospital that you predominantly work in?
  - a. Tertiary
  - b. Metropolitan
  - c. Regional
  - d. Rural
  - e. Private
6. Where is your hospital located?
  - a. Victoria
  - b. Western Australia
  - c. New South Wales
  - d. Tasmania
  - e. ACT
  - f. Queensland
  - g. South Australia
  - h. Northern Territory
  - i. New Zealand
  - j. Other (Hong Kong, Singapore, etc)

7. What position do you currently hold in the hospital?
  - a. Consultant epileptologist
  - b. Consultant neurologist
  - c. Epilepsy fellow
  - d. Advanced trainee
  - e. Hospital medical officer
8. If you are a consultant, how long have you held this position for?
  - a. Less than one year
  - b. 1 – 2 years
  - c. 3 – 5 years
  - d. 6 – 10 years
  - e. > 10 years
9. Are you a fellow/member of any colleges?
  - a. Epilepsy Society of Australia (ESA)
  - b. Royal Australian College of Physicians (RACP)
  - c. Australian and New Zealand Association of Neurologists (ANZAN)
  - d. Australasian College of Emergency Medicine (FACEM)
  - e. Fellow of College of Intensive Care Medicine (CICM)
  - f. Not applicable

### Training

1. Do you hold ANZAN board accreditation for EEG?
  - a. No
  - b. Level 1
  - c. Level 2
  - d. Level 3
2. Have you completed a subspecialty fellowship in epilepsy?
  - a. No
  - b. 1 year
  - c. 2+ years
  - d. Combined neurophysiology (EEG/NCS) fellowship
3. Have you undertaken training/workshops in continuous EEG?
  - a. Yes
  - b. No
4. Approximately how many urgent EEGs do you read/report per month?
  - a. 0
  - b. 0-5

- c. 6-20
  - d. >20
5. Have you read/reported continuous EEG?
    - a. Yes
    - b. No
  6. Are you confident reading/reporting ICU EEG?
    - a. Confident
    - b. Somewhat confident
    - c. Neutral
    - d. Somewhat not confident
    - e. Not confident
  7. Are you confident in identifying convulsive status epilepticus?
    - a. Confident
    - b. Somewhat confident
    - c. Neutral
    - d. Somewhat not confident
    - e. Not confident
  8. Are you confident in identifying non-convulsive status epilepticus?
    - a. Confident
    - b. Somewhat confident
    - c. Neutral
    - d. Somewhat not confident
    - e. Not confident
  9. Are you confident in treating status epilepticus?
    - a. Confident
    - b. Somewhat confident
    - c. Neutral
    - d. Somewhat not confident
    - e. Not confident
  10. Do you think a national guideline for status epilepticus should be introduced?
    - a. Strongly agree
    - b. Agree
    - c. Mutual
    - d. Disagree
    - e. Strongly disagree
  11. Do you think a national guideline for the provision of continuous EEG should be introduced?

- a. Strongly agree
  - b. Agree
  - c. Mutual
  - d. Disagree
  - e. Strongly disagree
12. Do you think formal training should be given for ICU/continuous EEG?
- a. Yes for all neurologists
  - b. Yes only for epileptologists
  - c. Yes for critical care physicians
  - d. Yes for all
  - e. No

### Access and Equipment

1. Do you have a neuro-HDU at your hospital accessible for neurology patients?
  - a. Yes
  - b. No
2. Do you have a neuro-ICU at your hospital?
  - a. Yes
  - b. No
3. Is continuous (>1hr-24hrs) EEG available in your centre for the assessment of urgent admitted inpatients (ICU or ward)?
  - a. Yes
  - b. Yes but ad hoc
  - c. No, daily routine EEG if required
  - d. Less than daily routine EEG
  - e. No EEG
4. Approximately how many continuous EEGs does your centre perform per month?
  - a. 0
  - b. 1-2
  - c. 3-10
  - d. >10
5. Do you have remote computer access to review EEG?
  - a. Yes and live review
  - b. Yes and non-live review
  - c. No
6. Do you use quantitative EEG (QEEG) for assessment of continuous EEG?
  - a. Yes

- b. No
7. How many EEG machines do you have available for continuous EEG?
- a. 0
  - b. 1
  - c. 2
  - d. >2
8. What is your EEG technician/scientist coverage?
- a. 24/7 as required
  - b. 7 days within standard hours only
  - c. 5 days/wk standard hours
  - d. <5 days/wk
9. Number of neurologists/epileptologists that read/report urgent EEG?
- a. 0
  - b. 1
  - c. 2
  - d. >2
10. What is the frequency of cEEG review?
- a. Live (trained bedside nurse)
  - b. Ad hoc
  - c. Twice daily
  - d. Once daily
  - e. Retrospective post completion of study
11. What is the frequency of cEEG reporting?
- a. Live (trained bedside nurse EEG charting)
  - b. Ad hoc
  - c. Twice daily
  - d. Once daily
  - e. Retrospective post completion of study
12. How often does your centre have access to an epileptologist?
- a. 24/7 officially oncall
  - b. 24/7 unofficially oncall
  - c. Standard hours only
  - d. Staff general neurologists only
13. Does your unit audit status epilepticus and/or continuous EEG?
- a. No
  - b. Yes

14. What is the largest barrier to commencing or expanding a continuous EEG service at your hospital?
- a. Non-believer
  - b. Lack of funding
  - c. Lack of physical resources including equipment and technology
  - d. Lack of personnel
  - e. Lack of knowledge to run a continuous EEG service
  - f. Other (specify)

### Management of Status Epilepticus

1. Do you have local hospital guidelines published for management of status epilepticus
  - a. Yes
  - b. No
2. What is your most commonly-used first line therapy for status epilepticus?
  - a. Midazolam
  - b. Clonazepam
  - c. Lorazepam
  - d. Diazepam
  - e. Antiepileptic drug
  - f. Other
  - g. TOTAL DOSE:
  - h. ROUTE: Buccal, inhaled, intranasal, IM, IV
3. What is your most commonly-used second line therapy for status epilepticus?
  - a. Levetiracetam
  - b. Phenytoin
  - c. Valproate
  - d. Lacosamide
  - e. Benzodiazepine infusion
  - f. Other
  - g. DOSE:
4. What is your most commonly-used third line therapy for status epilepticus?
  - a. Levetiracetam
  - b. Phenytoin
  - c. Valproate
  - d. Lacosamide
  - e. Benzodiazepine infusion
  - f. Barbiturate infusion
  - g. Increase/repeat second line therapy
  - h. Anaesthetic induction and intubation
  - i. DOSE:
5. What stage do you advise anaesthetic induction and intubation?
  - a. Benzodiazepine failure
  - b. 1<sup>st</sup> AED failure
  - c. 2<sup>nd</sup> AED failure
  - d. Other (specify)

6. At what stage following poor recovery in consciousness post seizure would you recommend an urgent EEG?
  - a. 10mins
  - b. 30mins
  - c. 60mins
  - d. >2hrs
7. How long would you routinely assess for using urgent EEG?
  - a. 10mins
  - b. 15mins
  - c. 30mins
  - d. 60mins
  - e. >60mins
  - f. >60mins only if epileptiform activity seen
8. Following cessation of convulsive seizures and non-convulsive (electrographic) status epilepticus seen on EEG, would you continue the EEG?
  - a. No
  - b. Yes for 24hrs
  - c. Yes until seizures cessation
  - d. Yes until seizure cessation and for a further 24hrs without seizures
9. Following cessation of convulsive seizures and non-convulsive (electrographic) status epilepticus seen on EEG, what treatment would you advise next?
  - a. No treatment
  - b. Benzodiazepine challenge
  - c. Escalate AEDs
  - d. Recommend anaesthesia and intubation
10. Which anaesthetic would you recommend for anaesthetic induction for cessation of seizures? (May select 2)
  - a. Midazolam
  - b. Propofol
  - c. Thiopentone
  - d. Phenobarbitone
  - e. Pentobarbital
  - f. Ketamine
11. What treatment target do you aim for following refractory status epilepticus?
  - a. Absence of clinical seizures (without EEG)
  - b. Anaesthetic induction for 24hrs (without EEG)
  - c. Seizure cessation



- d. Seizure cessation for >24hrs
  - e. Suppression of all epileptic activity
  - f. Suppression of all epileptic activity for >24hrs
  - g. Burst suppression
  - h. Burst suppression for 24hrs
  - i. Case specific targets
12. Are you experienced in any of the following therapies for refractory status epilepticus?  
(may select many)
- a. Further trials of AEDs
  - b. Barbiturate coma
  - c. Ketamine
  - d. Ketogenic diet
  - e. Immunotherapy
  - f. Vagal nerve stimulation (VNS)
  - g. Epilepsy surgery
  - h. Electroconvulsant therapy (ECT)
13. What treatment target do you aim for management of non-convulsive status epilepticus?
- a. Absence of clinical seizures (without EEG)
  - b. Seizure cessation via intermittent (non-continuous) EEG
  - c. Seizure cessation via continuous EEG
  - d. Suppression of all seizures and rhythmic periodic discharges >2Hz
  - e. Suppression of all epileptiform activity
  - f. Anaesthetic induced burst suppression
  - g. Case specific targets
14. What maximal escalation of care would you suggest for treatment of non-convulsive status epilepticus?
- a. Ward based escalation of AEDs
  - b. Ward based escalation of AEDs and limited infusional sedation eg. Midazolam
  - c. Refer to HDU/ICU for infusional sedation/anaesthetic without intubation
  - d. Refer to ICU for anaesthetic induction and intubation

## APPENDIX 2 – RESULTS FOR SUBSEQUENT MANAGEMENT OF STATUS EPILEPTICUS

| Questions and Alternatives                                                                                                                    | Responses (%), n=34* |
|-----------------------------------------------------------------------------------------------------------------------------------------------|----------------------|
| What stage do you advise anaesthetic induction and intubation for convulsive status epilepticus?                                              |                      |
| - Benzodiazepine failure                                                                                                                      | 3 (9%)               |
| - 1 <sup>st</sup> antiepileptic drug failure                                                                                                  | 9 (26%)              |
| - 2 <sup>nd</sup> antiepileptic drug failure                                                                                                  | 22 (65%)             |
| What stage do you advise anaesthetic induction and intubation for non-convulsive status epilepticus?                                          |                      |
| - Benzodiazepine failure                                                                                                                      | 2 (6%)               |
| - 1 <sup>st</sup> antiepileptic drug failure                                                                                                  | 1 (3%)               |
| - 2 <sup>nd</sup> antiepileptic drug failure                                                                                                  | 17 (50%)             |
| - Never                                                                                                                                       | 3 (9%)               |
| - Other*                                                                                                                                      | 11 (32%)             |
| At what stage following poor recovery in consciousness without ongoing overt seizures post seizure would you ideally recommend an urgent EEG? |                      |
| - 10mins                                                                                                                                      | 5 (15%)              |
| - 30mins                                                                                                                                      | 8 (24%)              |
| - 60mins                                                                                                                                      | 17 (50%)             |
| - 2hrs                                                                                                                                        | 4 (12%)              |
| - Never                                                                                                                                       | 0 (0%)               |
| If non-convulsive status or non-convulsive seizures are suspected, what duration of EEG assessment would you recommend?                       |                      |
| - 10-15mins                                                                                                                                   | 0 (0%)               |
| - 30mins                                                                                                                                      | 5 (15%)              |
| - 60mins                                                                                                                                      | 8 (24%)              |
| - 3hrs                                                                                                                                        | 1 (3%)               |

|                                                                                                                                                   |          |
|---------------------------------------------------------------------------------------------------------------------------------------------------|----------|
| - 24hrs                                                                                                                                           | 13 (38%) |
| - >60mins only if epileptiform activity is seen                                                                                                   | 4 (12%)  |
| - Other*                                                                                                                                          | 3 (9%)   |
| Following cessation of convulsive seizures, non-convulsive (electrographic) status epilepticus seen on EEG. What treatment would you advise next? | N=33*    |
| - No treatment                                                                                                                                    | 0 (0%)   |
| - Benzodiazepine challenge                                                                                                                        | 7 (21%)  |
| - Escalate AEDs                                                                                                                                   | 10 (30%) |
| - Recommend anaesthesia and intubation                                                                                                            | 3 (9%)   |
| - Case by case decision                                                                                                                           | 13 (39%) |
| Which anaesthetic would you recommend for anaesthetic induction for refractory status epilepticus? (May select 2)                                 |          |
| - Midazolam                                                                                                                                       | 21 (64%) |
| - Propofol                                                                                                                                        | 24 (73%) |
| - Thiopentone                                                                                                                                     | 9 (27%)  |
| - Phenobarbitone                                                                                                                                  | 4 (12%)  |
| - Pentobarbital                                                                                                                                   | 1 (3%)   |
| - Ketamine                                                                                                                                        | 2 (6%)   |
| What treatment target do you aim for following refractory status epilepticus?                                                                     |          |
| - Absence of clinical seizures (without EEG)                                                                                                      | 1 (3%)   |
| - Anaesthetic induction for 24hrs (without EEG)                                                                                                   | 0 (0%)   |
| - Electrographic seizure cessation                                                                                                                | 6 (18%)  |
| - Electrographic seizure cessation for >24hrs                                                                                                     | 10 (30%) |
| - Suppression of all epileptiform activity                                                                                                        | 1 (3%)   |
| - Suppression of all epileptiform activity for >24hrs                                                                                             | 1 (3%)   |
| - Burst suppression                                                                                                                               | 1 (3%)   |
| - Burst suppression for 24hrs                                                                                                                     | 9 (27%)  |
| - Case specific targets                                                                                                                           | 4 (12%)  |
| What treatment target do you aim for management of non-convulsive seizures or non-convulsive status epilepticus?                                  |          |

|                                                                                                       |          |
|-------------------------------------------------------------------------------------------------------|----------|
| - Absence of clinical seizures (without EEG)                                                          | 0 (0%)   |
| - Seizure cessation via intermittent (non-continuous) EEG                                             | 6 (18%)  |
| - Seizure cessation via continuous EEG                                                                | 16 (48%) |
| - Suppression of all epileptiform activity                                                            | 2 (6%)   |
| - Anaesthetic induced burst suppression                                                               | 3 (9%)   |
| - Case specific targets                                                                               | 5 (15%)  |
| - Other (specify)                                                                                     | 1 (3%)   |
| What maximal escalation of care would you suggest for treatment of non-convulsive status epilepticus? |          |
| - Ward based escalation of AEDs                                                                       | 0 (0%)   |
| - Ward based escalation of AEDs and limited infusional sedation eg. Midazolam                         | 3 (9%)   |
| - Refer to HDU/ICU for infusional sedation/anaesthetic without intubation                             | 9 (27%)  |
| - Refer to ICU for anaesthetic induction and intubation                                               | 16 (48%) |
| - Other (specify)                                                                                     | 5 (15%)  |
| Treatment experience for super refractory status epilepticus                                          |          |
| - Further trials of AEDs                                                                              | 32 (97%) |
| - Barbiturate coma                                                                                    | 29 (88%) |
| - Ketamine                                                                                            | 23 (70%) |
| - Ketogenic diet                                                                                      | 26 (79%) |
| - First line immunotherapy (steroids, IVIg, plasma exchange)                                          | 30 (91%) |
| - Second line immunotherapy (rituximab, cyclophosphamide etc.)                                        | 19 (58%) |
| - Vagal nerve stimulation (VNS)                                                                       | 7 (21%)  |
| - Epilepsy surgery                                                                                    | 17 (52%) |
| - Electroconvulsant therapy (ECT)                                                                     | 2 (6%)   |
| - Others:                                                                                             | 0 (0%)   |
| Do you think a national guideline for management of status epilepticus should be introduced?          |          |
| - Strongly agree                                                                                      | 16 (48%) |

|                     |          |
|---------------------|----------|
| - Agree             | 10 (30%) |
| - Neutral           | 6 (18%)  |
| - Disagree          | 1 (3%)   |
| - Strongly disagree | 0 (0%)   |

*\*2 participants did not provide complete responses for this section*
